# Supplementary material
Source: Research Square preprint supplement (doi:10.21203/rs.3.rs-9349525/v1)
Supplement: Supplementary file 1 [file b76b332b3fd4eb04be8f2814.docx]

**Supplementary Information**

Non-Hermitian Skin Effect on Directed Networks: Rigorous Open-Boundary Turing Results and a Testable Hypothesis for the Kinetics-Independence of Tau Pathology Localisation in Alzheimer’s Disease

Han Liu, Qun Liang

# **S1. Overview and convention statement**

This Supplementary Information accompanies the manuscript and provides the complete numerical procedures, parameter values, and reproduction instructions referenced in the article. Because the present study consists of mathematical derivations and illustrative numerical verification, no patient-level data are involved; all material required to reproduce the spectral and eigenstate results of Theorems 1–3 and Figures 1–2 is contained in this document together with a single accompanying Python script (nhse_reproduce.py). Running the script with default parameters reproduces every numerical value reported in Section 5 of the main text.

## **S1.1 Operator convention for the open-boundary directed ring**

Throughout the main text and this Supplementary Information, the directed-ring Laplacian under open boundary conditions is defined with a uniform on-site term −(t_R + t_L) applied to every node, including the two boundary nodes. This is the Hatano–Nelson convention used throughout the non-Hermitian skin-effect literature (Yao and Wang 2018; Yokomizo and Murakami 2019), and is equivalent to compensating the lost out-degree at the two boundary nodes with virtual self-loops of weight t_L (left boundary) and t_R (right boundary). The convention is necessary for the analytical spectrum of Equation (13) and the eigenstate formula of Equation (14) to hold exactly. Without it, the Laplacian L = A^T − D^{out} of Equation (3) acquires non-uniform boundary on-site terms, which introduces two boundary-defect modes outside the bulk interval and obscures the bulk skin-effect physics that Theorems 1–3 characterise. The convention does not alter any of the bulk predictions of the manuscript and is consistent with the Asllani et al. (2014) framework that the present work generalises.

# **S2. Parameter values used in the numerical verification**

All numerical computations in Section 5 of the main text use the parameter values listed in Table S1. The values are deliberately modest: t_R = 3, t_L = 1 reproduces the biologically motivated anterograde-to-retrograde ratio of 3 reported for the perforant path in non-human primate tract-tracing studies, and N ∈ {20, 30, 50} spans network sizes for which exact diagonalisation is unproblematic and finite-size effects are clearly visible.

| **Parameter** | **Symbol** | **Value** | **Source / role** |
| --- | --- | --- | --- |
| Forward hopping rate | t_R | 3.0 | Eq. (8); Witter 1989 |
| Backward hopping rate | t_L | 1.0 | Eq. (8); Witter 1989 |
| Hopping ratio | r* = sqrt(t_R / t_L) | 1.7320508... | Eq. (12) |
| Localisation length | xi = 2 / ln(t_R / t_L) | 1.8205 hops | Eq. (15) |
| OBC interval lower bound | lambda_min | -7.4641016... | Eq. (16) |
| OBC interval upper bound | lambda_max | -0.5358984... | Eq. (16) |
| Network size sweep | N | 20, 30, 50 | Section 5; Figure 1 |
| Eigenmode index range | n | 1, 2, ..., N | Eq. (14) |
| Boundary-region threshold | epsilon | 0.5 | Eq. (18) |
| Kinetic deformation sweep | |chi| | 10^-1 to 10^1, 5 values | Theorem 3 verification |

Table S1. Parameter values used in numerical verification of Theorems 1–3.

# **S3. Theorem 1 - extended derivation**

Theorem 1 of the main text states that the OBC spectrum of the directed-ring Laplacian is contained in the real interval Sigma_OBC = [-(√ t_R + √ t_L)², -(√ t_R - √ t_L)²]. The proof in the main text establishes the result by direct evaluation of the generalised-Brillouin-zone formula. For completeness this section supplies the algebraic detail.

Step 1 (similarity to a real symmetric tridiagonal). Under the Hatano–Nelson convention of Section S1.1, the OBC Laplacian L has matrix entries L_{i,i-1} = t_R, L_{i,i+1} = t_L, L_{i,i} = -(t_R + t_L), and zero elsewhere. Define the diagonal similarity transform S = diag(1, r*, (r*)^2, ..., (r*)^{N-1}) with r* = √(t_R / t_L). A direct computation gives (S^{-1} L S)_{i,j} = √(t_R t_L) for |i-j| = 1 and -(t_R + t_L) for i = j, which is real symmetric tridiagonal.

Step 2 (real eigenvalues). Real symmetric matrices have real spectrum. Since similarity transforms preserve eigenvalues, spec(L) ⊂ R.

Step 3 (closed form). The real symmetric tridiagonal matrix S^{-1} L S is a Toeplitz operator with first off-diagonal √(t_R t_L) and constant diagonal -(t_R + t_L). Its eigenvalues are well-known to take the form lambda_n = 2 √(t_R t_L) cos(n π/(N+1)) - (t_R + t_L), for n = 1, 2, ..., N. As cos(n π/(N+1)) ranges over (-1, 1) the eigenvalues populate Sigma_OBC.

Step 4 (topological obstruction). The corresponding PBC operator has eigenvalues Lambda_PBC(k) = t_R e^{-ik} + t_L e^{ik} - (t_R + t_L), which trace an ellipse with imaginary semi-axis |t_R - t_L| > 0 for t_R ≠ t_L. The winding number of this ellipse around any interior point is unity (Eq. 10), establishing topological non-triviality and explaining why the OBC and PBC spectra cannot be deformed into each other.

## **S3.1 Numerical verification of Theorem 1**

Running the script nhse_reproduce.py reports the following diagnostics for t_R = 3, t_L = 1, after exact diagonalisation of the OBC Laplacian using numpy.linalg.eigvals.

| **N** | **max |Im(lambda)|** | **max |numerical - analytical|** | **Conclusion** |
| --- | --- | --- | --- |
| 20 | 0.0 (exact) | 9.4 x 10^-12 | Spectrum is real; matches Eq. (16) |
| 30 | 0.0 (exact) | 7.7 x 10^-10 | Spectrum is real; matches Eq. (16) |
| 50 | 0.0 (exact) | 1.0 x 10^-5 | Spectrum is real; matches Eq. (16) |

The growth in numerical residual at N = 50 reflects the conditioning of the similarity transform: the diagonal scaling matrix S contains entries up to (r*)^{N-1} ≈ 4.9 x 10^11, and floating-point evaluation of the corresponding tridiagonal cosine formula loses approximately log_10((r*)^N) digits in the worst case. The imaginary part of every eigenvalue is identically zero to machine precision, confirming the qualitative claim of Theorem 1 independently of the numerical residual on the eigenvalue location.

# **S4. Theorem 2 - eigenstate envelope and the standing-wave factor**

The OBC eigenstate associated with mode index n is given by Equation (14) of the main text: psi_j^{(n)} = (r*)^j sin(j theta_n) / sin(theta_n), with theta_n = n π / (N + 1). The exponential factor (r*)^j carries no dependence on n, so every mode shares the same envelope; the standing-wave factor sin(j theta_n) / sin(theta_n) modulates individual node amplitudes but leaves the geometric decay slope unchanged. This decomposition is the content of Theorem 2.

Numerical verification proceeds by enumerating all N modes at N = 50 and confirming that on a logarithmic plot the moduli |psi_j^{(n)}| have parallel slopes equal to ln(r*) ≈ 0.549. This is exactly what Figure 2 (right panel) of the main text shows; the script reproduces this output as figure2_eigenstates.png.

## **S4.1 The terminal-node algebraic identity**

A central element of the proof of Theorem 3 is the algebraic identity |sin(N theta_n)| = |sin(theta_n)| for theta_n = n π / (N + 1). The derivation is direct: N theta_n = n π - n π / (N+1) = n π - theta_n, so sin(N theta_n) = sin(n π - theta_n) = (-1)^{n+1} sin(theta_n). Taking absolute values gives the identity. As a consequence, the terminal-node amplitude F_N = |psi_N^{(n)}| evaluates to (r*)^N for every mode index n, independently of theta_n. This eliminates any need for a lower-bound argument on the standing-wave factor and is the feature that distinguishes the present formulation from earlier OBC analyses in condensed-matter physics.

Running the verification function in the accompanying script reports a maximum deviation of 1.7 x 10^-14 across all 50 modes at N = 50, which is at the level of double-precision rounding error and confirms the identity to machine accuracy.

# **S5. Theorem 3 - boundary-region invariance and mode switching**

Theorem 3 of the main text establishes that, when the dominant mode index n*(t) is constant along a kinetic-parameter path gamma(t) ⊂ P, the boundary region Omega_epsilon(t) = { j : |Phi_j(t)| ≥ epsilon max_k |Phi_k(t)| } is invariant for every epsilon ∈ (0, 1). The proof in the main text relies on the observation that, when n* is fixed, theta* = n* π / (N + 1) is independent of all kinetic parameters and the spatial profile factorises as |Phi_j^*| = |chi*| · (r*)^j · |sin(j theta*) / sin(theta*)|, in which only the prefactor |chi*| depends on the kinetic parameters. As Omega_epsilon involves the ratio |Phi_j| / max_k |Phi_k|, the prefactor cancels and Omega_epsilon is determined entirely by (r*, theta*, N).

Numerical illustration of this invariance is implemented as follows. With n* = 50 (the highest-index mode at N = 50), the spatial profile is computed once from Equation (14). The kinetic prefactor chi is then varied across five values spanning two orders of magnitude (chi ∈ {0.1, 0.316, 1, 3.16, 10}), and Omega_{0.5} is recomputed at each chi. The script reports Omega_{0.5} = {47, 48, 49, 50} for every value of chi, verifying invariance. This confirms the theoretical statement with no remaining floating-point ambiguity.

## **S5.1 Mode switching as the principal failure mode**

The main text notes that mode switching - a change in dominant mode index n*(t) along gamma - is the principal failure mode of the kinetics-independence claim, and occurs on a codimension-one surface in the kinetic-parameter space P. This surface is the set { p ∈ P : Re mu_+(Lambda(theta_{n*})) = Re mu_+(Lambda(theta_{n*+1})) }, where mu_+(Lambda) is the larger root of the quadratic stability polynomial h(Lambda; J_0, D_u, D_v) of Equation (7). Random one-dimensional paths in P intersect this surface with probability zero in the Lebesgue sense; predetermined biological contrast paths (for example, varying TREM2 carrier status while holding all other parameters fixed) may or may not cross. Empirical detection of mode switching along a biologically relevant path constitutes partial refutation of Prediction 2 in the main text and should be tested rather than assumed away.

Within the parameter sweep reported in Section 5 of the main text and reproduced by the accompanying script, no mode switching is observed. This is consistent with mode stability over the tested range but does not constitute a proof for all biologically relevant paths; that remains an empirical question.

# **S6. Reproduction script**

The accompanying file nhse_reproduce.py is a self-contained Python script that reproduces every numerical value in Section 5 and regenerates Figures 1 and 2. It depends only on NumPy and Matplotlib (any version >= 1.20 and >= 3.3 respectively). Total run time on a standard laptop is under five seconds. Invocation:

$ python3 nhse_reproduce.py

Expected output (truncated):

Theorem 1: real OBC spectrum

Analytical OBC interval Sigma_OBC = [-7.464102, -0.535898]

N = 20: max|Im(lambda)| = 0.00e+00, max|num - analytical| = 9.43e-12

N = 30: max|Im(lambda)| = 0.00e+00, max|num - analytical| = 7.70e-10

N = 50: max|Im(lambda)| = 0.00e+00, max|num - analytical| = 1.02e-05

Theorem 2 + terminal-node algebraic identity

r* = sqrt(tR/tL) = 1.732051, (r*)^N = 8.472886e+11

Algebraic identity verified for all 50 modes (max deviation = 1.70e-14).

Terminal-node amplitude F_N = (r*)^N for every mode.

Theorem 3: boundary-region invariance

|chi| = 0.1: Omega = (47, 48, 49, 50)

|chi| = 0.316: Omega = (47, 48, 49, 50)

|chi| = 1: Omega = (47, 48, 49, 50)

|chi| = 3.16: Omega = (47, 48, 49, 50)

|chi| = 10: Omega = (47, 48, 49, 50)

Theorem 3 verified.

## **S6.1 Outline of the script**

The script defines two operators (directed_ring_pbc and directed_ring_obc, Section A), three verification routines (verify_theorem1, verify_theorem2_and_terminal_node, verify_theorem3, Sections B-D), and two figure builders (make_figure1, make_figure2, Section E). Each routine is at most twenty lines of NumPy and uses no specialised libraries. The eigenstate function obc_eigenstate implements Equation (14) literally: psi_j^{(n)} = (r*)^j sin(j theta_n) / sin(theta_n), with no approximation to the standing-wave factor.

# **S7. Data and code availability**

This study did not generate or analyse any human or animal data. All material required to reproduce the spectral and eigenstate results is contained in this Supplementary Information together with the accompanying Python script nhse_reproduce.py. The script is supplied as a single file and is publicly archived alongside this Supplementary Information at the journal’s permanent record. Any further implementation details (for example, the post-processing scripts used to format Figures 1 and 2 for the main text) are available from the corresponding author on reasonable request.
